# Supplementary material for: Sodium and potassium salts of bumetanide trihydrate: Impact of counterion on structure, aqueous solubility and dehydration kinetics
Source: Royal Society of Chemistry journal article supplement (doi:10.1039/c2ce06631a), 2012-01-01
Supplement: c2ce06631a.pdf [file c2ce06631a.pdf]

## Sodium and potassium salts of bumetanide trihydrate: Impact of counterion on structure, aqueous solubility and dehydration kinetics

Winston Ong,\* Eugene Y. Cheung, Karen A. Schultz, Cartney Smith, James Bourassa, and Magali B. Hickey

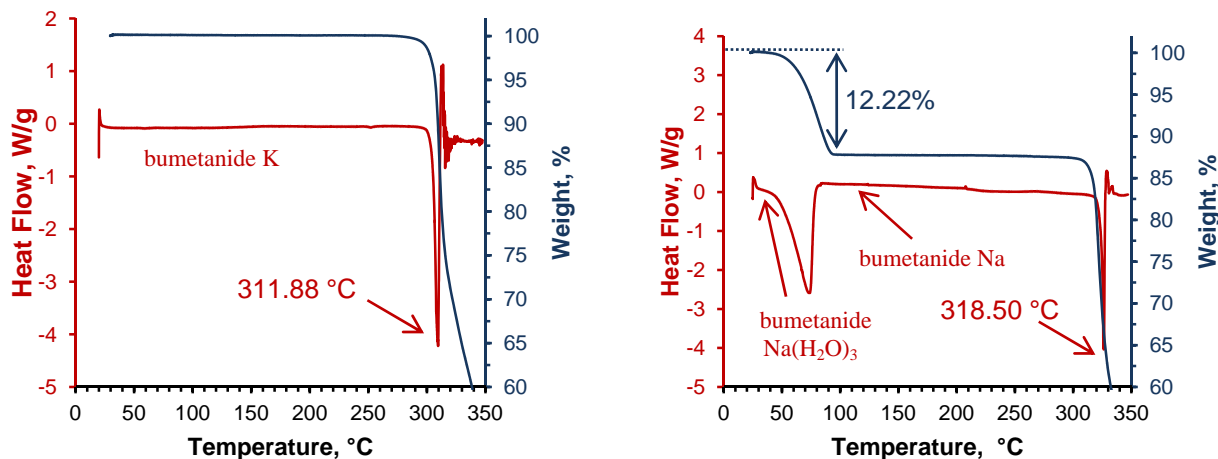

**Fig. S1** Left: DSC and TGA thermograms of **bumetanide K** are featureless prior to melt-decomposition at 300 °C. Right: TGA thermogram of **bumetanide Na(H<sub>2</sub>O)<sub>3</sub>** showed a 12.2% mass loss due to dehydration to produce **bumetanide Na**, which melted and decomposed at >300 °C. The DSC thermogram of **bumetanide Na(H<sub>2</sub>O)<sub>3</sub>** was recorded using a pinhole pan.

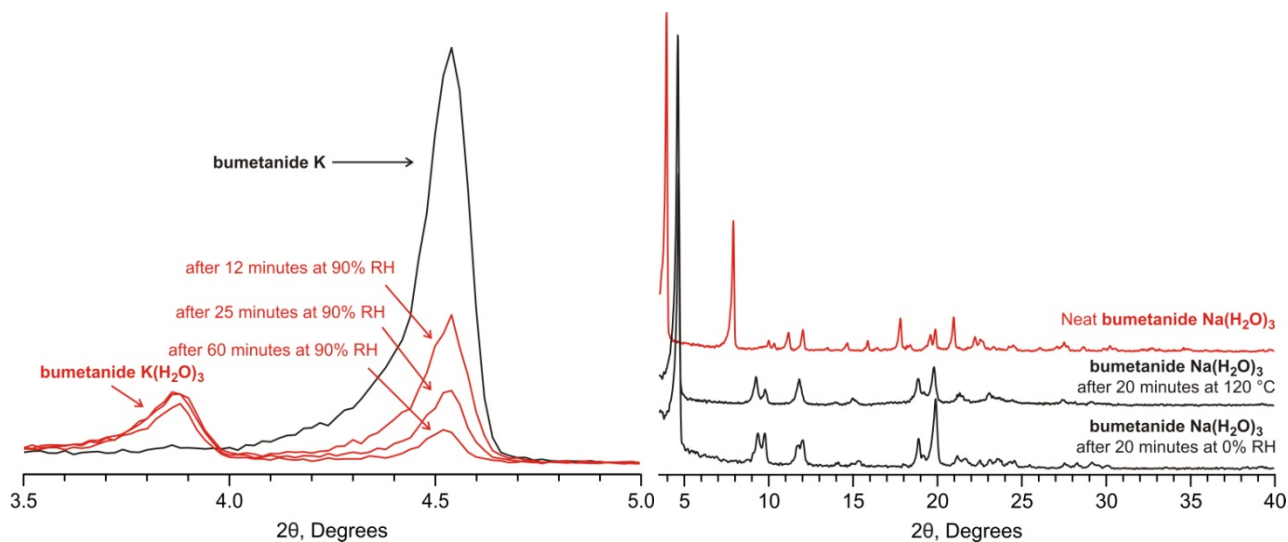

**Fig. S2** PXRD patterns of **bumetanide K** and **bumetanide Na(H<sub>2</sub>O)<sub>3</sub>** following exposure to extreme humidity conditions (i.e., 90% RH or <10% RH) and elevated temperature. Left: exposure of **bumetanide K** to 90% RH resulted in the disappearance of the reflection at 4.5 degrees at the expense of the emerging reflection at 3.9 degrees, which corresponds to **bumetanide K(H<sub>2</sub>O)<sub>3</sub>**. Prolonged exposure at 90% RH to achieve quantitative conversion was not attempted due to moisture build-up in the equipment. Right: **bumetanide Na** was produced after exposure of **bumetanide Na(H<sub>2</sub>O)<sub>3</sub>** to 120 °C or 0% RH for 20 minutes.

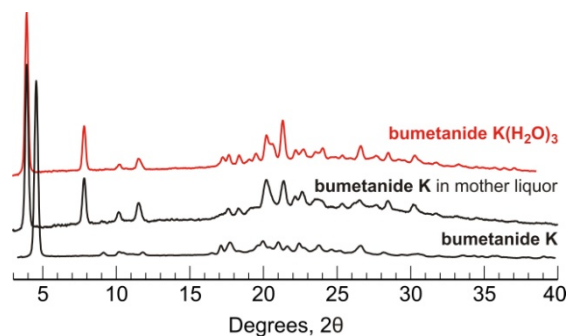

**Fig. S3** PXRD pattern of neat **bumetanide K** (bottom) and its suspension in mother liquor (middle). PXRD of suspension was acquired within a minute after **bumetanide K** was suspended in the mother liquor. PXRD of **bumetanide K(H<sub>2</sub>O)<sub>3</sub>** (top), which was recorded from freshly harvested crystals grown in H<sub>2</sub>O, is shown for comparison.

**Table S1** Solubility of bumetanide salts starting from **bumetanide K** and **bumetanide Na(H<sub>2</sub>O)<sub>3</sub>** at various pH values. Hydrochloric acid was used to acidify the suspensions. To raise alkalinity, sodium hydroxide was used for **bumetanide Na(H<sub>2</sub>O)<sub>3</sub>**, while potassium hydroxide was used for **bumetanide K**. Solubility values are reported as the free-acid equivalent.

| <b>bumetanide K</b> |                                      | <b>bumetanide Na(H<sub>2</sub>O)<sub>3</sub></b> |                                      |
|---------------------|--------------------------------------|--------------------------------------------------|--------------------------------------|
| pH                  | Concentration (mg mL <sup>-1</sup> ) | pH                                               | Concentration (mg mL <sup>-1</sup> ) |
| 1.62                | 0.00016                              | 2.42                                             | 0.00014                              |
| 2.77                | 0.0017                               | 2.52                                             | 0.0012                               |
| 5.71                | 0.55                                 | 3.13                                             | 0.0018                               |
| 6.27                | 2.0                                  | 5.64                                             | 0.46                                 |
| 6.87                | 7.7                                  | 6.38                                             | 2.4                                  |
| 7.96                | 27                                   | 6.46                                             | 3.0                                  |
| 8.19                | 27                                   | 6.55                                             | 5.3                                  |
| 9.69                | 27                                   | 8.33                                             | 5.6                                  |
| 9.90                | 26                                   | 8.48                                             | 5.5                                  |
| 10.6                | 28                                   | 10.4                                             | 6.2                                  |
